# Supplementary material for: Prevalence and influences of diabetes and prediabetes among adults living with HIV in Africa: a systematic review and meta‐analysis
Source: PubMed Central journal article supplement (PMC10018386; doi:10.1002/jia2.26059), 2023-03-16

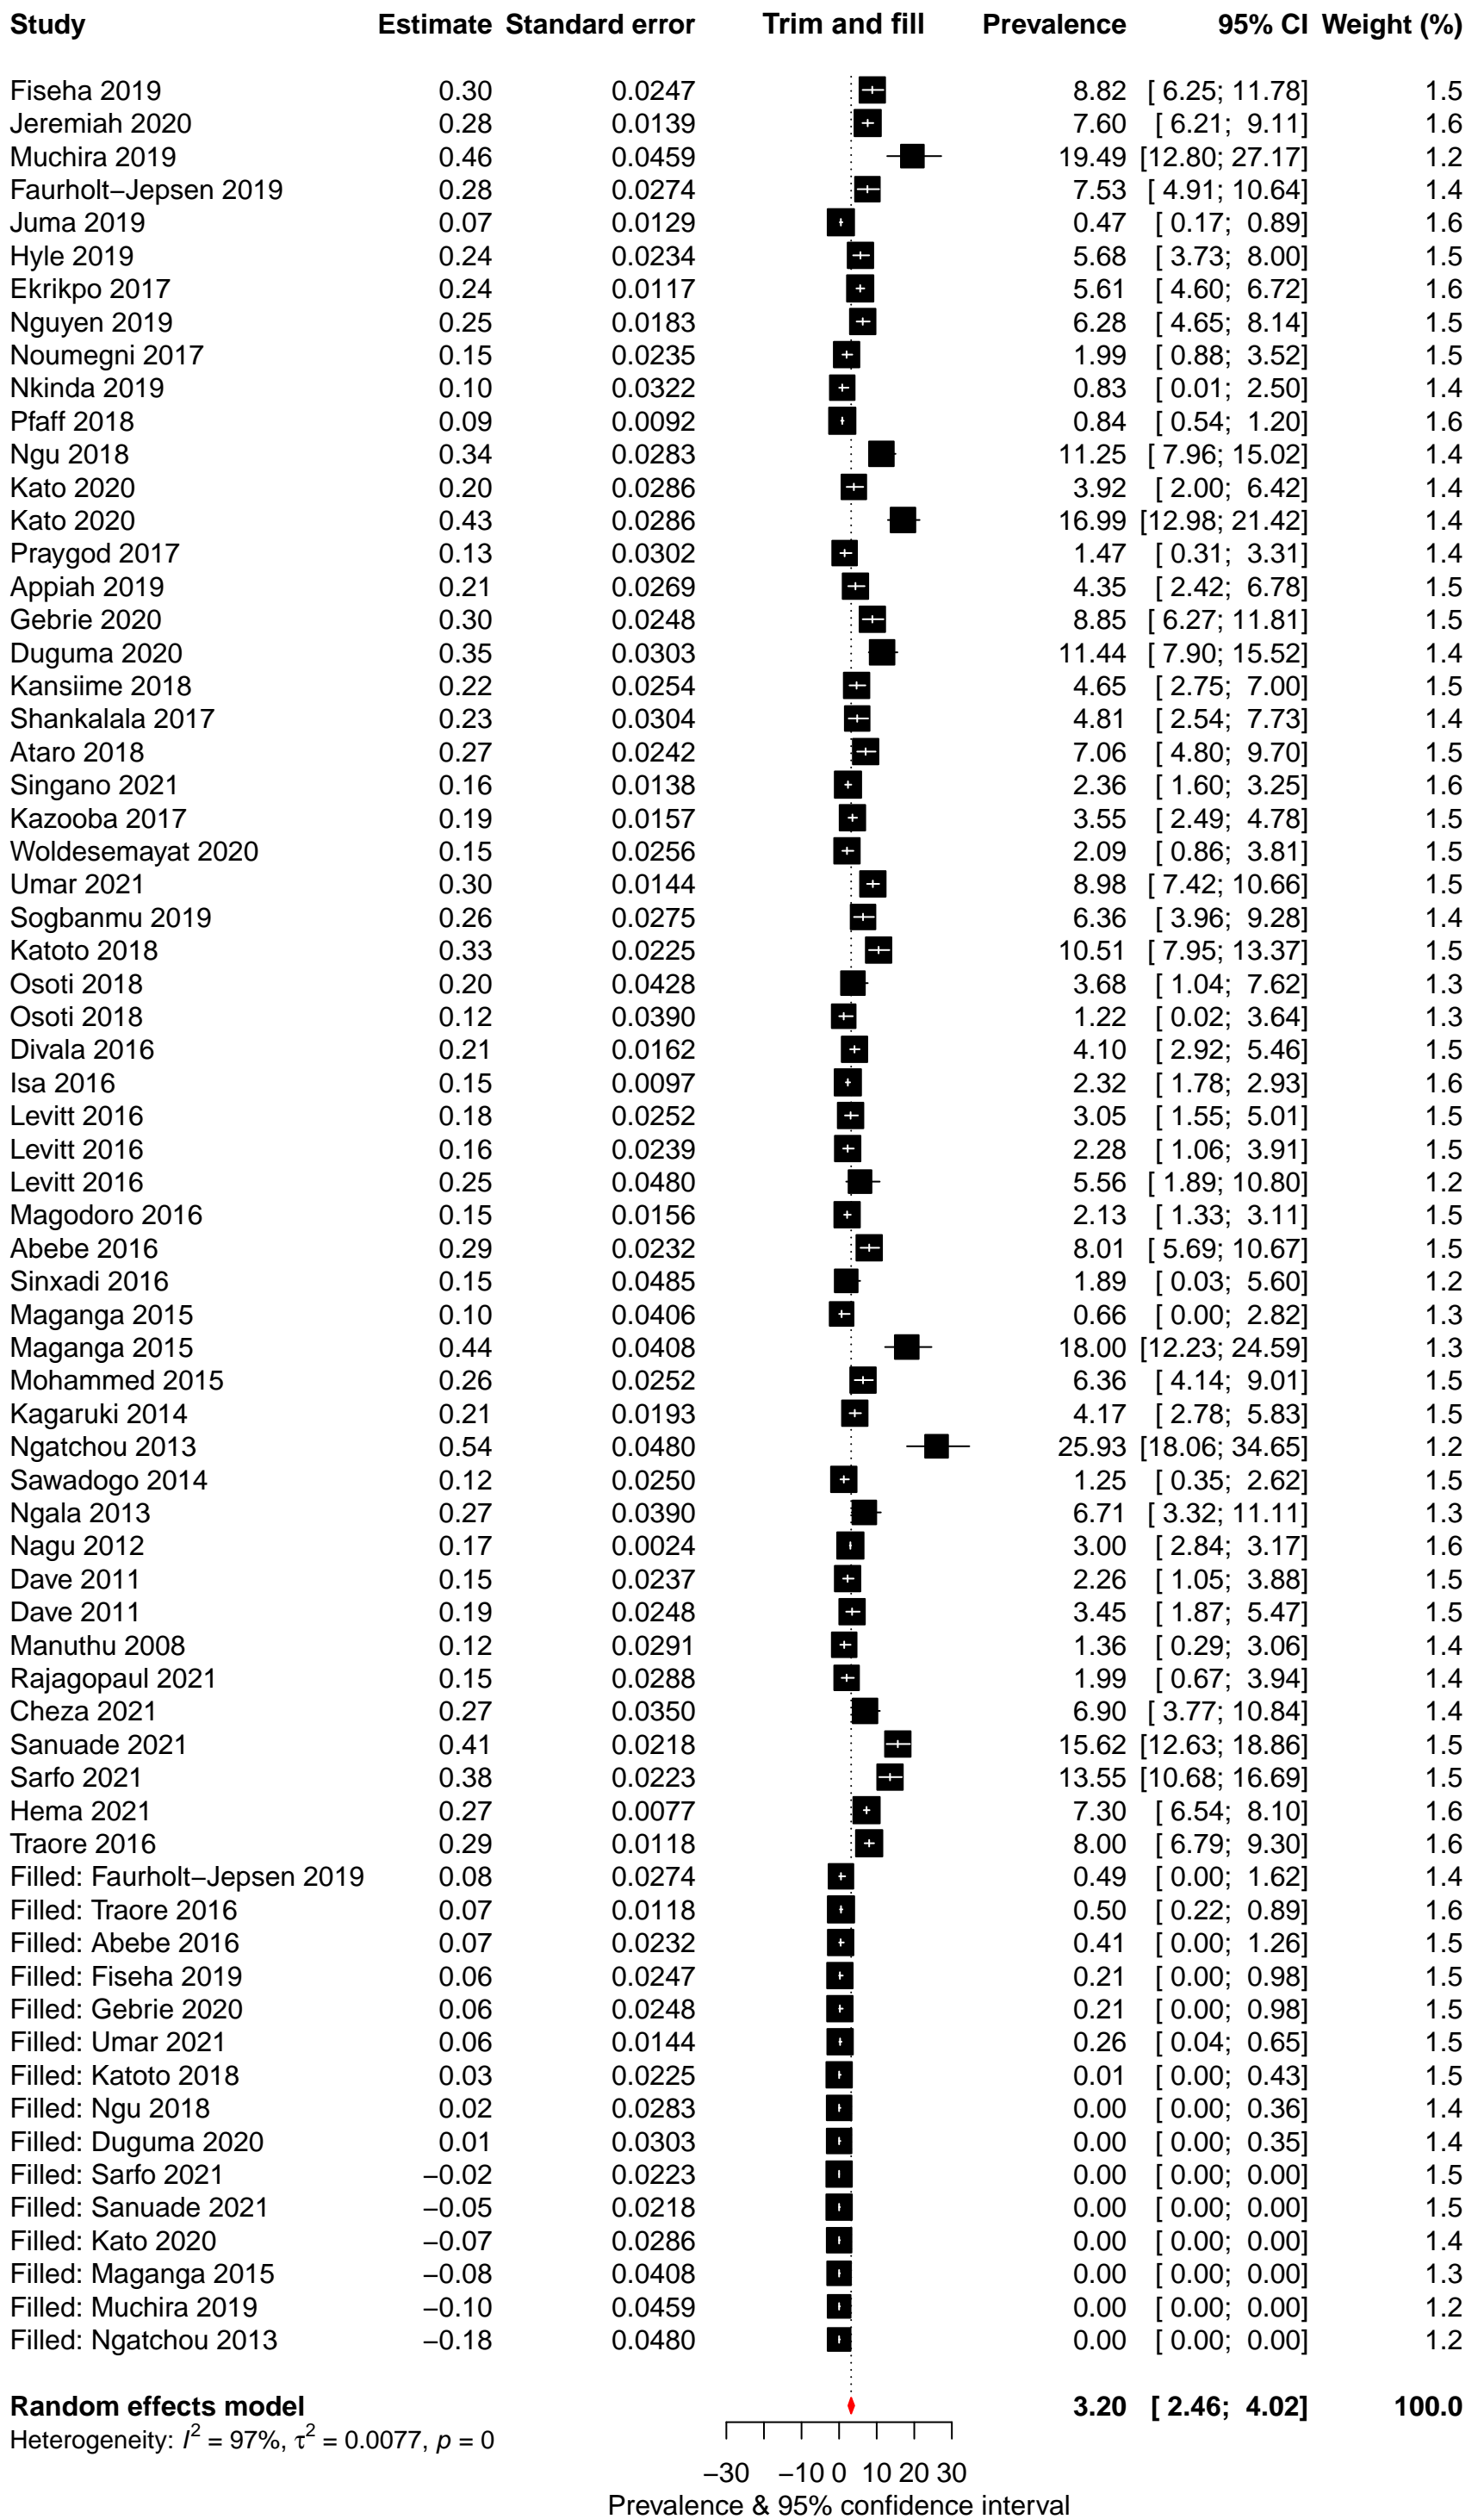

Supplement: JIA2-26-e26059-s008.pdf [file JIA2-26-e26059-s008.pdf]
